# Supplementary material
Source: PubMed Central journal article supplement (PMC5684441)
Supplement: onc2017276x2.pdf [file onc2017276x2.pdf]

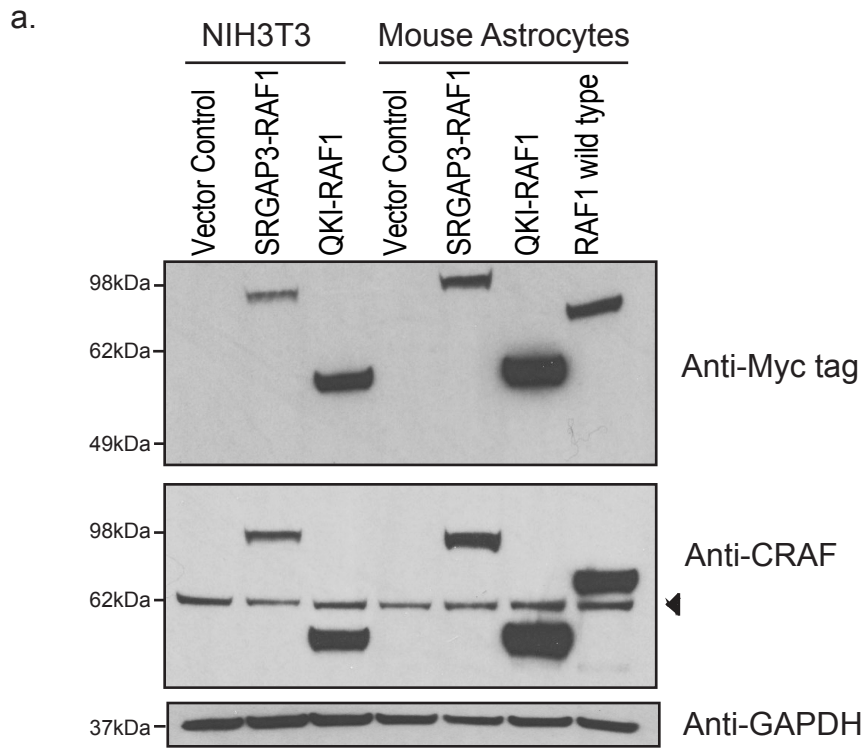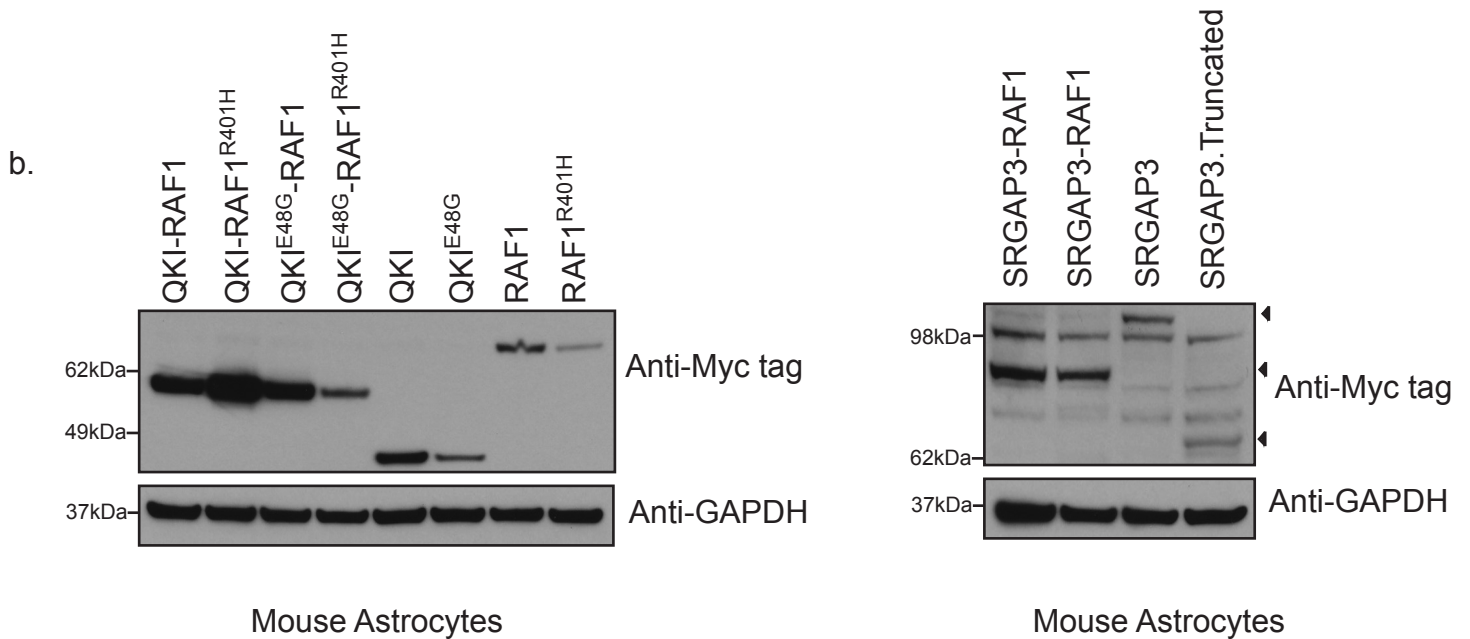

**Supplementary Figure S1. Expression of fusion proteins in heterologous model systems.** (a) Westerns showing stable expression of Myc-tagged vector control, QKI-RAF1 and SRGAP3-RAF1 in NIH3T3 and p53-null mouse astrocyte cells (PMAs) using anti-Myc tag antibody and anti-CRAF antibody (arrow shows endogenous CRAF/RAF1 in both cell systems). (b) PMAs showing stable expression of QKI-RAF1, SRGAP3-RAF1, QKI, RAF1 and respective dimerization mutants, along with SRGAP3 and its truncated version (exons 1-10).
