# Supplementary material
Source: PubMed Central journal article supplement (PMC5684441)
Supplement: onc2017276x3.pdf [file onc2017276x3.pdf]

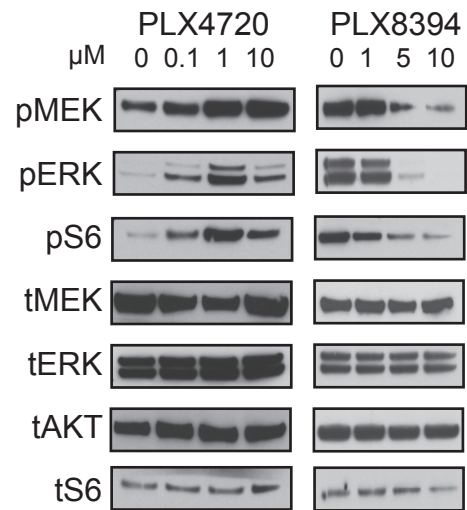

**KIAA1549-BRAF- NIH 3T3**

**Supplementary Figure S2.** Effect of RAF inhibitors on KIAA1549-BRAF signaling. Western blots showing effect of PLX4720 and PLX8394 on MAPK and PI3K/mTOR pathway proteins regulated by KIAA1549-BRAF expressing NIH3T3.
