# Supplementary material
Source: PubMed Central journal article supplement (PMC5684441)
Supplement: onc2017276x4.pdf [file onc2017276x4.pdf]

a.

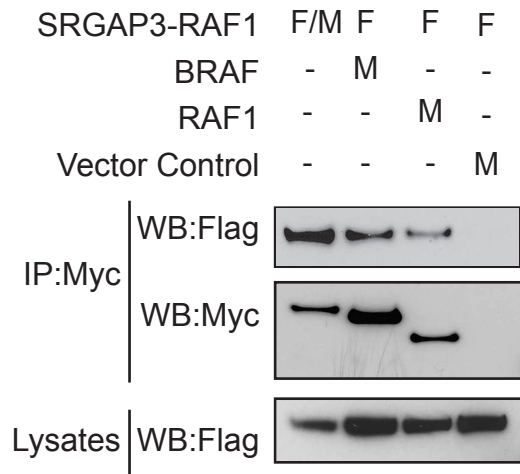

b.

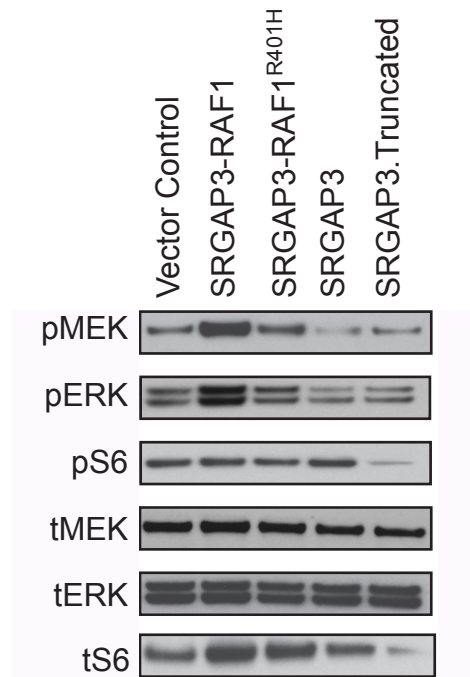

c.

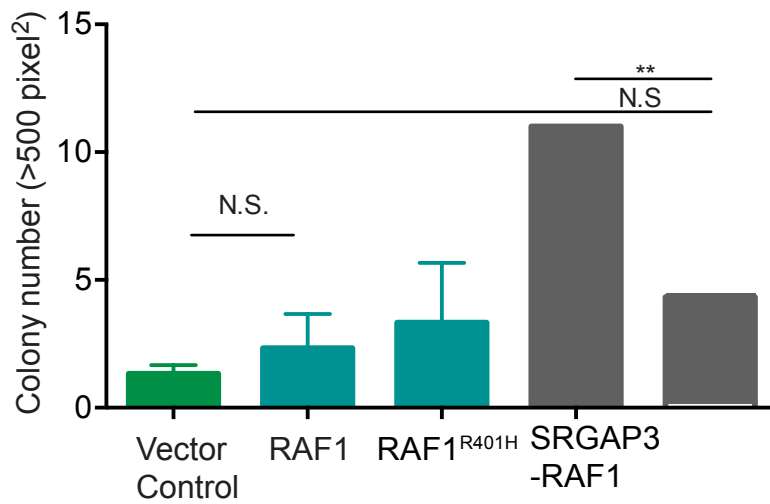

**Supplementary Figure S3. SRGAP3-RAF1 mediated dimerization and oncogenicity is partly mediated by CRAF/RAF1.** (a) Co-IP assays of SRGAP3-RAF1 dimerization with itself and with wild type BRAF and CRAF. (b) Westerns showing effect of single dimerization mutants of SRGAP3-RAF1 (RAF1R401H) expressing PMAs on MAPK and PI3K/mTOR pathways. (c) Soft agar assays showing effect of SRGAP3-RAF1R401H on colony formation.
