# Supplementary material
Source: PubMed Central journal article supplement (PMC5684441)
Supplement: onc2017276x5.pdf [file onc2017276x5.pdf]

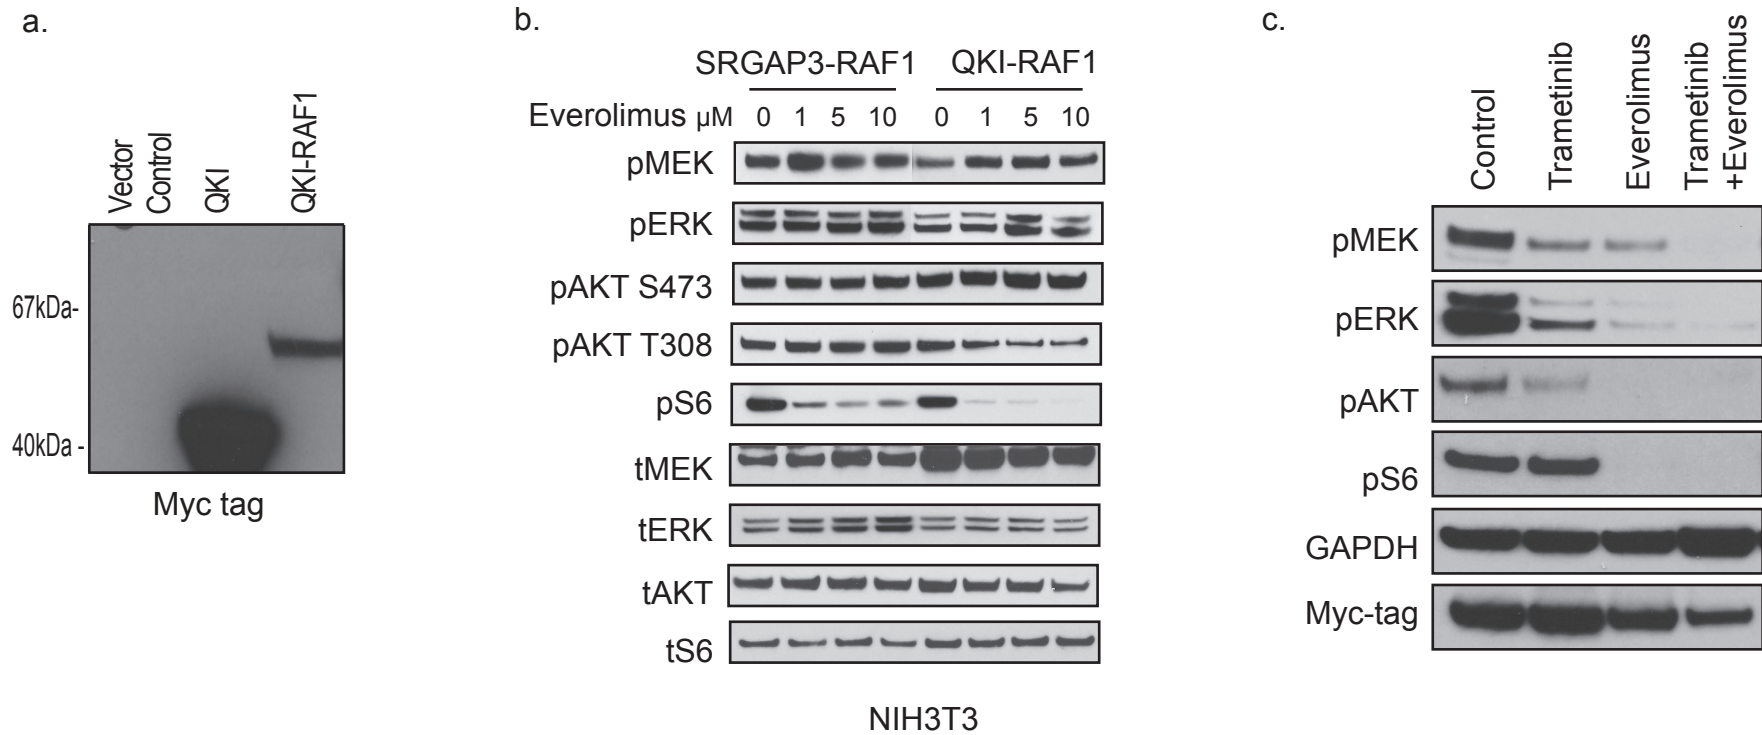

**Supplementary Figure S4.** (a) Expression level of QKI and QKI-RAF1 in UV cross-linking assay. Western blot showing protein expression levels in HEK293 cells. (b) Western blot showing effect of mTORi everolimus as single-agent on signaling pathways driven by CRAF-fusion expressing NIH3T3. (c) Mouse xenografts display in vivo targeting by trametinib and everolimus. NIH3T3 expressing QKI-RAF1 (Myc-tagged) engrafted as mouse flank xenografts and treatment shown in figure 7d followed by tumor extraction at end of experiment for WB analysis.
