# Supplementary material
Source: PubMed Central journal article supplement (PMC5684441)
Supplement: onc2017276x6.pdf [file onc2017276x6.pdf]

a.

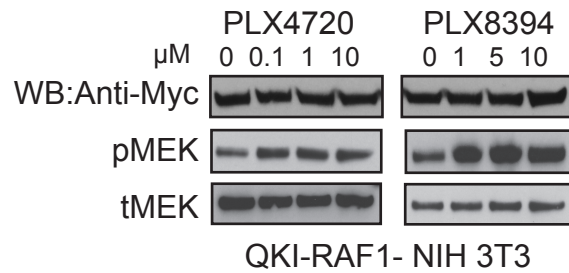

b.

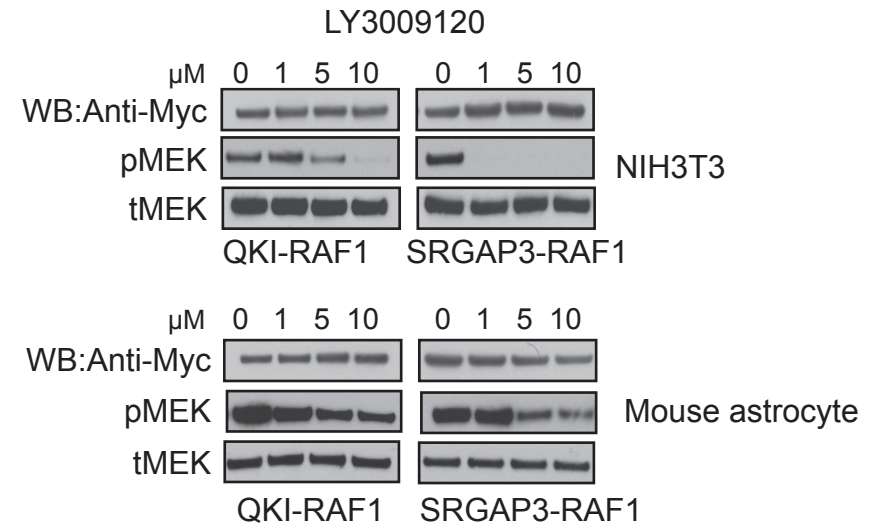

c.

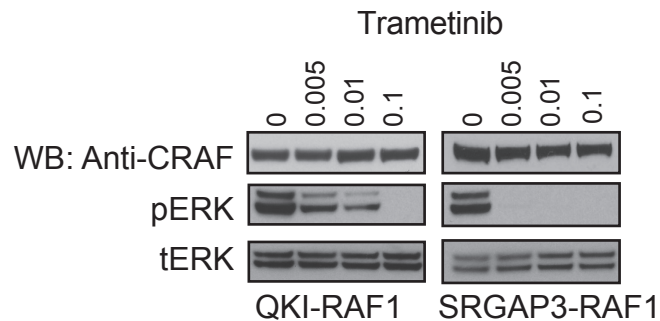

d.

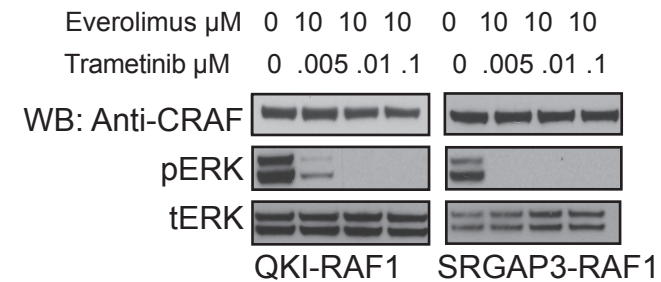

**Supplementary Figure S5. Kinase inhibitors do not affect CRAF fusion protein stability in heterologous model systems.** (a) PLX4720 and PLX8394 treated cell lysates from NIH3T3s (from figure 2a) were tested for Myc-tagged CRAF-fusion proteins in the presence of increasing RAF inhibitor dosage. (b) LY3009120 treated cell lysates from PMAs (from figure 5a) and NIH3T3 (from figure 5c) were tested for Myc-tagged CRAF-fusion proteins with increasing drug concentrations. (c) Trametinib treated cell lysates from PMAs (from figure 6a, c) and (d) Trametinib+Everolimus treated PMAs (from figure 7a, c) were tested for CRAF-fusion proteins with increasing trametinib concentrations.
